# Supplementary material for: Microbe-Derived Antioxidants Reduce Lipopolysaccharide-Induced Inflammatory Responses by Activating the Nrf2 Pathway to Inhibit the ROS/NLRP3/IL-1β Signaling Pathway
Source: MDPI journal article supplement (doi:10.3390/ijms232012477), 2022-10-18
Supplement: s1 [file s1]

**Table S1.** Primers used in current study.

| <b>Gene</b>    | <b>Forward Primer (5'-3')</b> | <b>Reverse Primer (5'-3')</b> |
|----------------|-------------------------------|-------------------------------|
| NLRP3          | AGTGGATAGGTTTGCTGGGATA        | CTGGGTGTAGCGTCTGTTGAG         |
| ASC            | CTCTGTATGGCAATGTGCTGAC        | GAACAAGTTCTTGCAGGTCAG         |
| Caspase-1      | AGTGTAGGGACAATAAATGG          | GATGGACCTGACTGAAGC            |
| TNF- $\alpha$  | TATGGCTCAGGGTCCAACCTC         | GGAAAGCCCATTGAGTCCT           |
| IL-6           | CACGGCCTTCCCTACTTCAC          | TGCAAGTGCATCATCGTTGT          |
| IL-18          | GTGAACCCCAGACCAGACTG          | CCTGGAACACGTTTCTGAAAGA        |
| IL-1 $\beta$   | TTCTTTGAGGCTGACAGACC          | CGTCTTTCATCACACAGGAC          |
| Nrf2           | AGCAGGACATGGAGCAAGTT          | TTCTTTTTCCAGCGAGGAGA          |
| NQO-1          | TTCTGTGGCTTCCAGGTCTT          | AGGCTGCTTGGAGCAAATA           |
| HO-1           | CCCACCAAGTTCAAACAGCTC         | AGGAAGGCGGTCTTAGCCTC          |
| $\beta$ -actin | CGGTTCCGATGCCCTGAGGCTCTT      | CGTCACACTTCATGATGGAATTGA      |

**Table S2.** siRNAs fragment sequence used in current study.

| <b>Gene</b>     | <b>Forward Primer (5'-3')</b> | <b>Reverse Primer (5'-3')</b> |
|-----------------|-------------------------------|-------------------------------|
| <i>si</i> NLRP3 | CGGCCUUAUCUCAAUCUGUTT         | ACAGAUUGAAGUAAGGCCGTT         |
| <i>si</i> Nrf2  | GCAACUGUGGUCCACAUUUTT         | AAAUGUGGACCACAGUUGCTT         |
